# Supplementary material for: Effect of Flavonoid-Coated Gold Nanoparticles on Bacterial Colonization in Mice Organs
Source: PubMed Central journal article supplement (PMC7559771; doi:10.3390/nano10091769), 2020-09-07
Supplement: nanomaterials-10-01769-s001.pdf [file nanomaterials-10-01769-s001.pdf]

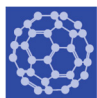

Supplementary Material

# Effect of Flavonoid-Coated Gold Nanoparticles on Bacterial Colonization in Mice Organs

Sundus Riaz <sup>1,2</sup>, Nosheen Fatima Rana <sup>1,\*</sup>, Irshad Hussain <sup>3</sup>, Tahreem Tanweer <sup>1</sup>, Afrah Nawaz <sup>1</sup>, Farid Menaa <sup>4</sup>, Hussnain A. Janjua <sup>5</sup>, Tahseen Alam <sup>5</sup>, Amna Batool <sup>1</sup>, Ayesha Naeem <sup>1</sup>, Maryam Hameed <sup>1</sup> and Syed Mohsin Ali <sup>1</sup>

<sup>1</sup> Department of Biomedical Engineering and Sciences, School of Mechanical & Manufacturing Engineering, National University of Sciences & Technology, Islamabad 44000, Pakistan; sundusriaz\_fuuast@yahoo.com (S.R.); ttanveer.pg@smme.edu.pk (T.T.); anawaz.bmes16smme@student.nust.edu.pk (A.N.); abatool.phd20sme@student.nust.edu.pk (A.B.); anaem.phd19bmessmme@student.nust.edu.pk (A.N.); maryam\_hameed@outlook.com (M.H.); mehvisriaz4@gmail.com (M.R.); sali.bmes17smme@student.nust.edu.pk (S.M.A.)

<sup>2</sup> Ministry of National Food Security and Research, Pakistan Agricultural Research Council, Karachi, 75270 Pakistan

<sup>3</sup> School of Science and Engineering, Lahore University of Management Sciences, Lahore 54000, Pakistan; ihussain@lums.edu.pk

<sup>4</sup> Department of Internal Medicine and Nanomedicine, California Innovations Corporation, San Diego, CA, 92093 USA; dr.fmenaa@gmail.com

<sup>5</sup> Atta Ur Rahman School of Applied Biosciences, National University of Sciences & Technology, Islamabad 44000, Pakistan principal-asab@nust.edu.pk (H.A.J.), tahseen260@gmail.com (T.A.)

\* Correspondence: nosheen.fatima@smme.nust.edu.pk; Fax: +92-9085-6001

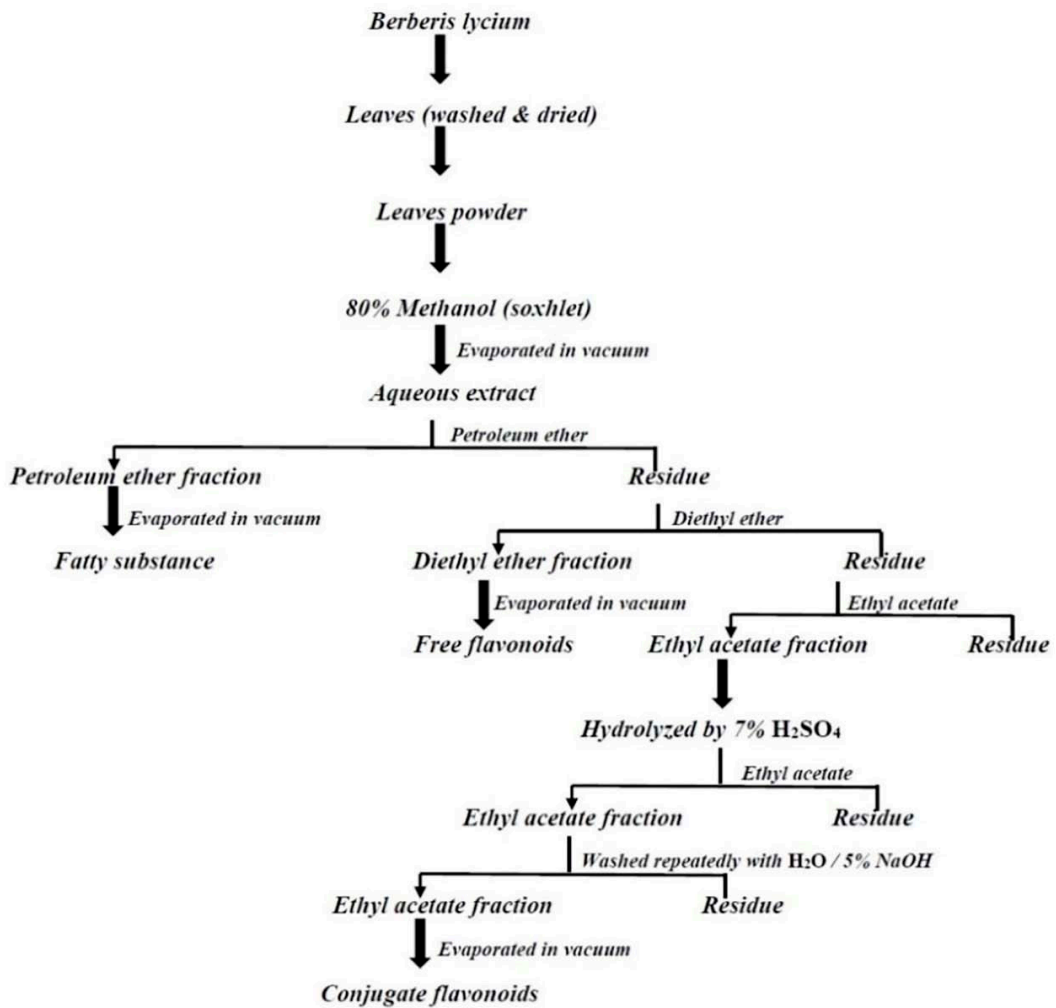

**Figure S1.** Extraction procedure for free and conjugated flavonoids.

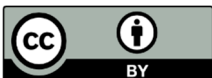

© 2020 by the authors. Licensee MDPI, Basel, Switzerland. This article is an open access article distributed under the terms and conditions of the Creative Commons Attribution (CC BY) license (<http://creativecommons.org/licenses/by/4.0/>).
